# Supplementary material
Source: publisher figshare collection journal article supplement (https://karger.figshare.com/articles/dataset/_/8283176)
Supplement: Supplementary file 1 [file 1]

Archive with 4 entries (4 files):
- DNE499126_sm2.PDF
- DNE499126_sm4.mpg
- DNE499126_sm3.mpg
- DNE499126_sm1.PDF
