# Supplementary material
Source: publisher figshare collection journal article supplement (https://karger.figshare.com/articles/dataset/_/8283176)
Supplement: Supplementary file 1 [file 1 › DNE499126_sm1.PDF]

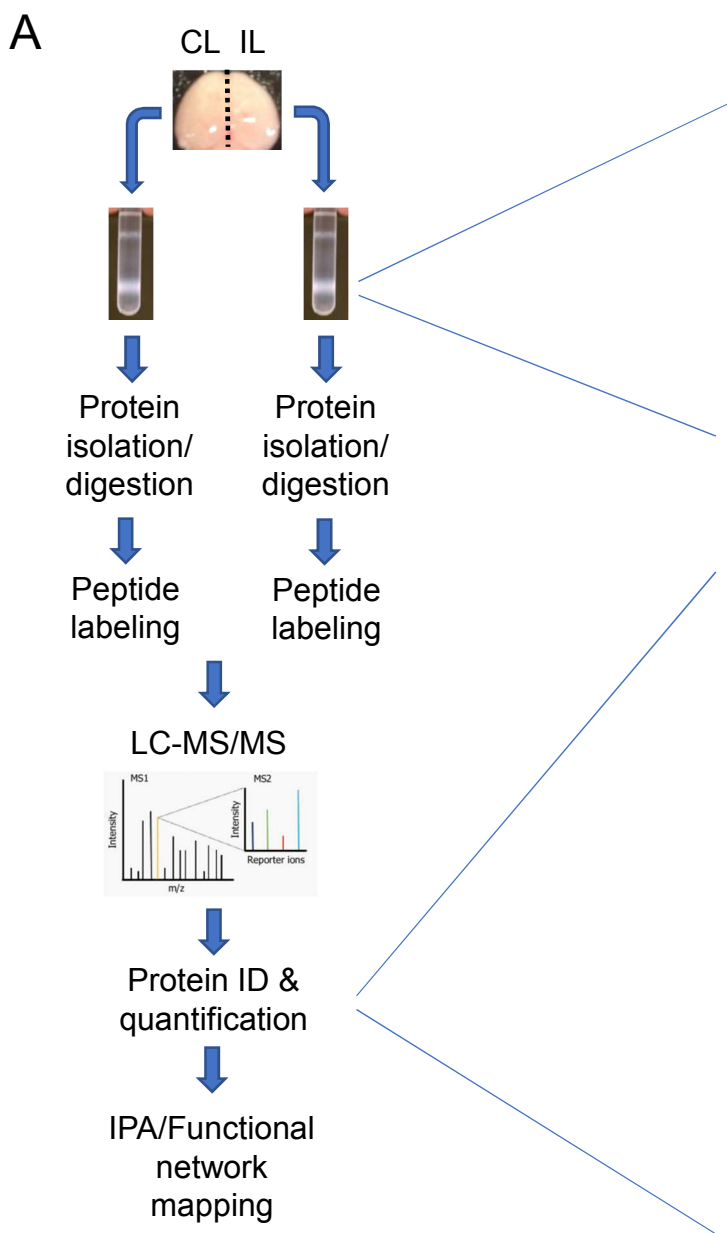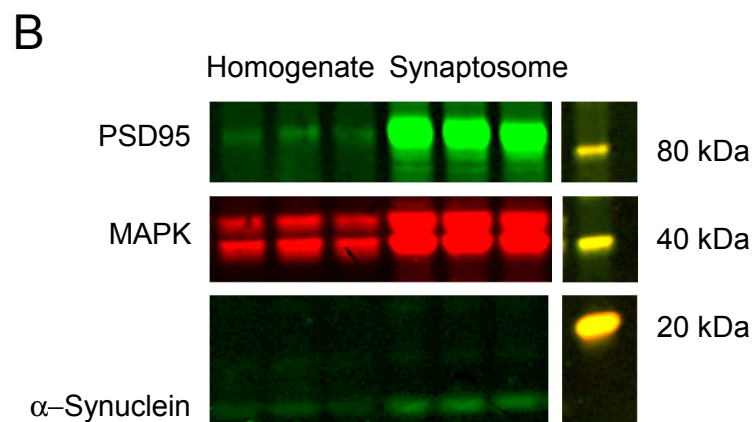

C

Single Table Summary of All Results

| Data Level                                            |                  | FDR Type | FDR | ID Yield |
|-------------------------------------------------------|------------------|----------|-----|----------|
| Identification Yield<br>at FDR Threshold              | Protein          | Local    | 1%  | 1705     |
|                                                       |                  |          | 5%  | 1910     |
|                                                       |                  |          | 10% | 1999     |
|                                                       |                  | Global   | 1%  | 2056     |
|                                                       |                  |          | 5%  | 2320     |
|                                                       |                  |          | 10% | 2498     |
|                                                       | Distinct peptide | Local    | 1%  | 10318    |
|                                                       |                  |          | 5%  | 14101    |
|                                                       |                  |          | 10% | 15592    |
|                                                       |                  | Global   | 1%  | 14710    |
|                                                       |                  |          | 5%  | 18463    |
|                                                       |                  |          | 10% | 19489    |
|                                                       | Spectral         | Local    | 1%  | 21171    |
|                                                       |                  |          | 5%  | 28151    |
|                                                       |                  |          | 10% | 30841    |
|                                                       |                  | Global   | 1%  | 29591    |
|                                                       |                  |          | 5%  | 35166    |
|                                                       |                  |          | 10% | 37121    |
|                                                       |                  |          |     |          |
| Corresponding Confidence in<br>ProteinPilot™ Software | Protein          | Local    | 1%  | 99.0%    |
|                                                       |                  |          | 5%  | 98.3%    |
|                                                       |                  |          | 10% | 96.2%    |
|                                                       |                  | Global   | 1%  | 93.7%    |
|                                                       |                  |          | 5%  | 57.3%    |
|                                                       |                  |          | 10% | 35.4%    |
|                                                       | Distinct peptide | Local    | 1%  | 97.7%    |
|                                                       |                  |          | 5%  | 58.4%    |
|                                                       |                  |          | 10% | 38.8%    |
|                                                       |                  | Global   | 1%  | 50.4%    |
|                                                       |                  |          | 5%  | 0.0%     |
|                                                       |                  |          | 10% | 0.0%     |
|                                                       | Spectral         | Local    | 1%  | 93.6%    |
|                                                       |                  |          | 5%  | 46.5%    |
|                                                       |                  |          | 10% | 29.7%    |
|                                                       |                  | Global   | 1%  | 37.0%    |
|                                                       |                  |          | 5%  | 0.0%     |
|                                                       |                  |          | 10% | 0.0%     |
