# Supplementary material
Source: publisher figshare collection journal article supplement (https://karger.figshare.com/articles/dataset/_/8283176)
Supplement: Supplementary file 1 [file 1 › DNE499126_sm2.PDF]

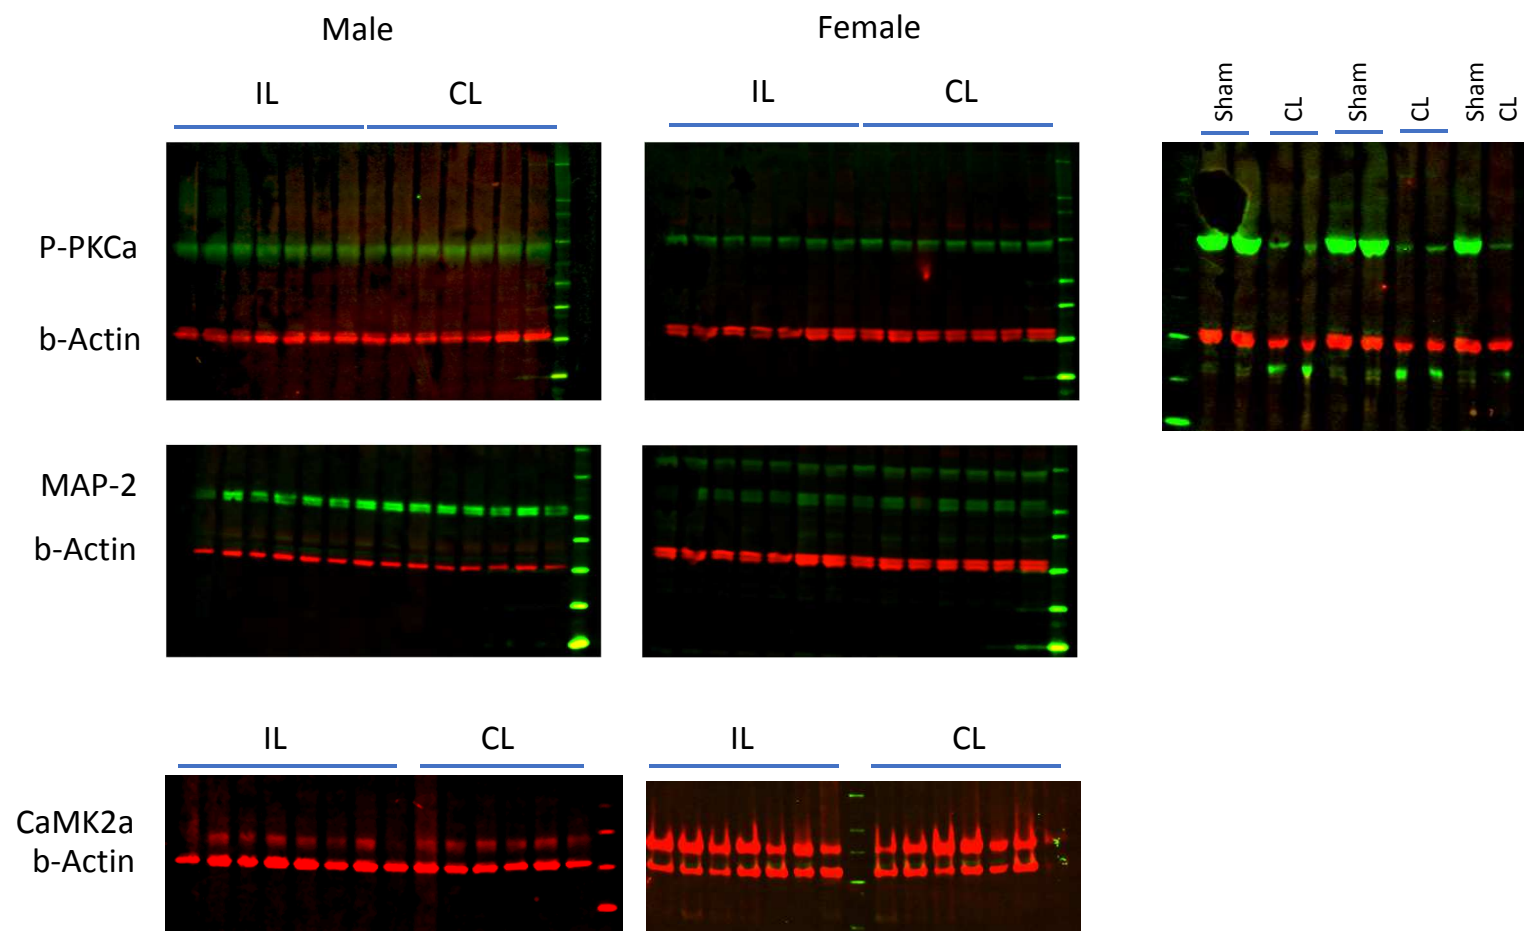

Supplemental Figure 2: Representative WB images for reviewer purpose only. Images were scanned using an Odyssey Infrared Imaging System (Li-Cor Biotechnology, Lincoln, NE). Left and middle panels show blot images from male and female pups, respectively. Right panel shows a blot image of Sham and male contralateral (CL) hemisphere of ligated pups.
